# Supplementary material
Source: PubMed Central journal article supplement (PMC6486329)
Supplement: jci-129-125423-s264.pdf [file jci-129-125423-s264.pdf]

## Supplementary Materials

### Materials and Methods

#### *PBMCs from healthy donors*

Peripheral blood was collected from healthy volunteer donors aged 18-26. Mononuclear cells were isolated from peripheral blood using CPT tube (BD) gel-barrier centrifugation. Purified CD8<sup>+</sup> populations were obtained by positive selection using MACS magnetic microbead sorting (Miltenyi) of the entire PBMC isolate, while CD4<sup>+</sup> cells were positively selected from the CD8-deplete fraction. Bulk PBMCs and purified CD4<sup>+</sup> and CD8<sup>+</sup> cells were cryopreserved in CryoStor (Sigma).

#### *TCR spectratyping*

Cryopreserved FP CD8<sup>+</sup> and CD4<sup>+</sup> cells were screened for clone-specific expansion using the TCR V $\beta$  Repertoire Kit (BD Biosciences). Analysis of 24 V $\beta$  segments was performed by incubating cells resuspended in PBS with the recommended volume of each of the eight TCR V $\beta$  antibody mixes provided with the kit and a CD3 mAB (BD Biosciences) for 20 minutes at room temperature. Cells were washed and fixed in 2% paraformaldehyde prior to acquisition on the LSRFortessa. Samples were analyzed using FlowJo software and the quantity of each V $\beta$  subset was reported as a percentage of the total CD3<sup>+</sup> population.

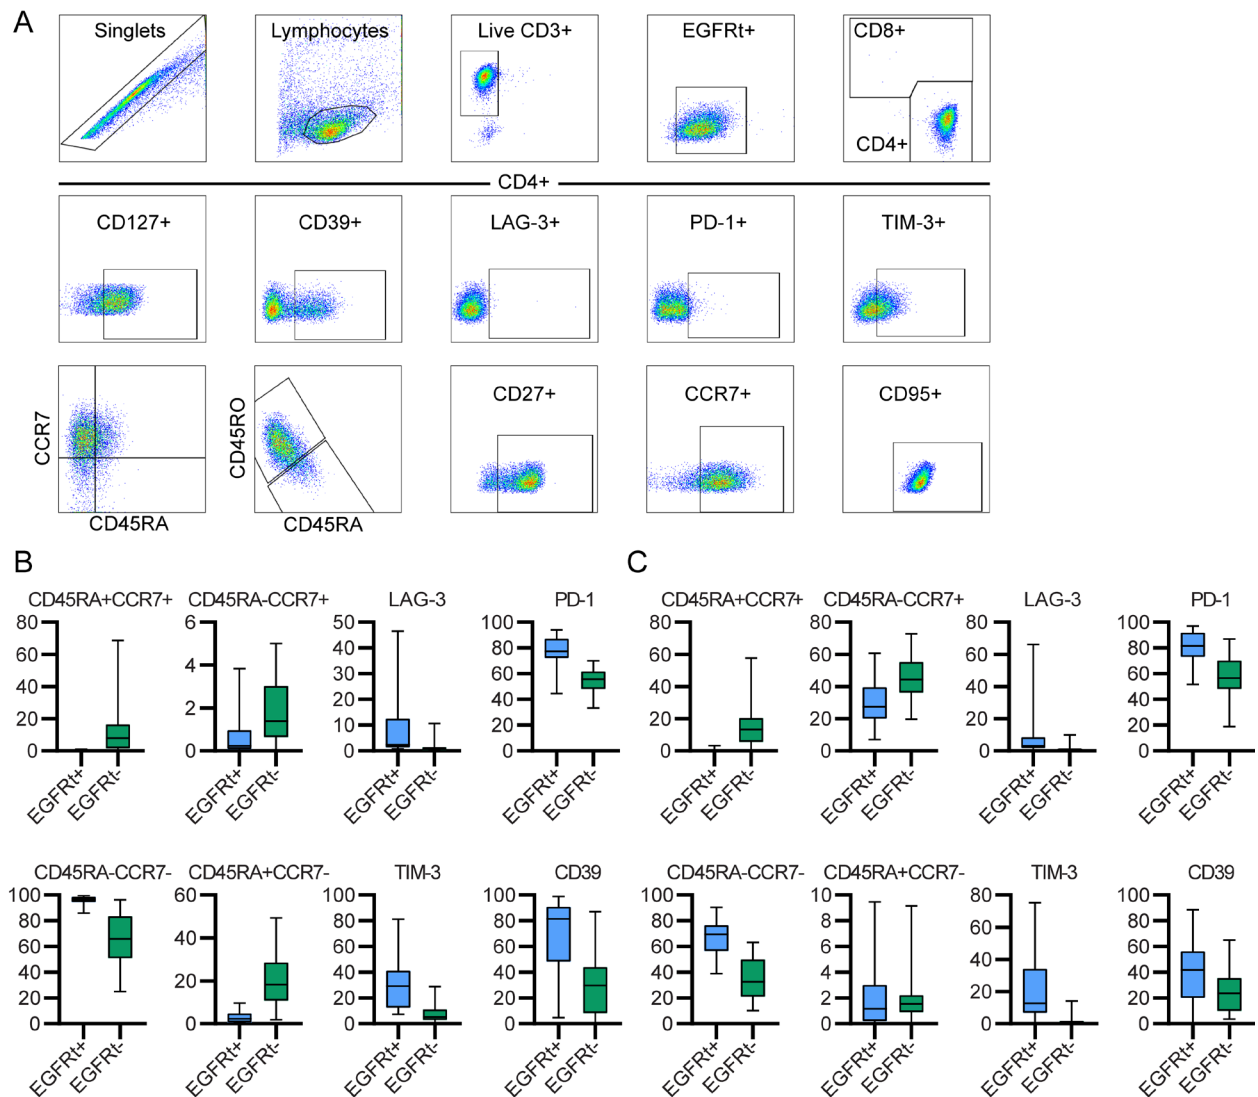

**Fig. S1: Phenotypic analysis of EGFRt<sup>+</sup> cells at peak expansion.** A. Representative gating of CD4<sup>+</sup> FP. B-C. Box plots of CD8<sup>+</sup> (B) and CD4<sup>+</sup> (C) EGFRt<sup>+</sup> (blue) and EGFRt<sup>-</sup> (green) phenotype at peak expansion (D10-D14). Bar represents the median, box represents the 25% and 75% quartiles, and error bars represent the range.

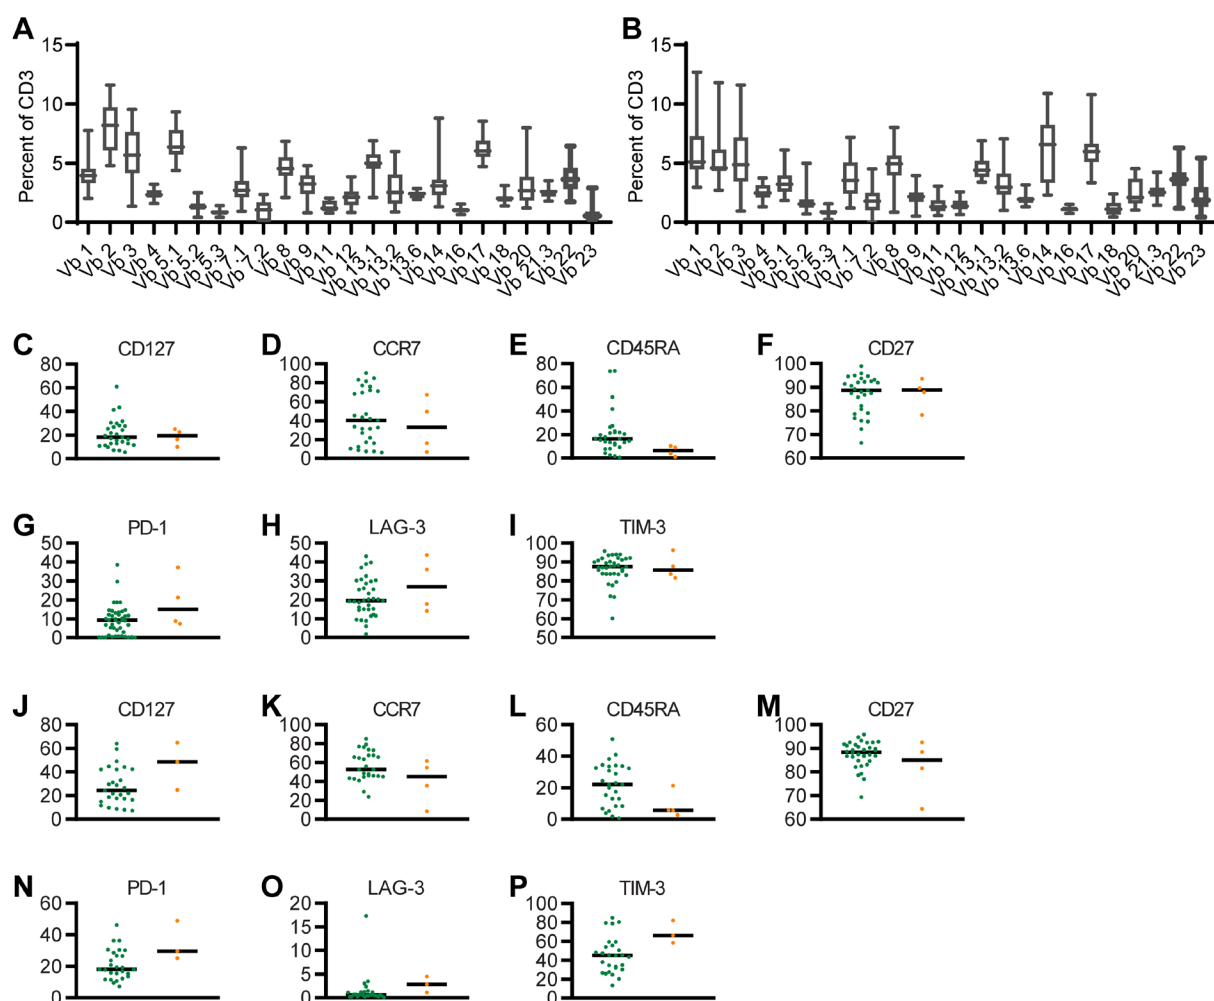

**Fig. S2: Phenotypic analysis of EGFRt+ final product cells in dysfunctional and functional groups.** A-B. Spectratype of CD8+EGFRt+ FP (A) and CD4+EGFRt+ FP (B). C-I. Dot plots of CD8+EGFRt+ FP cells expressing (C) CD127, (D) CCR7, (E) CD45RA, (F) CD27, (G) PD-1, (H) LAG-3 and (I). J-P. Dot plots of CD4+EGFRt+ FP cells expressing (J) CD127, (K) CCR7, (L) CD45RA, (M) CD27, (N) PD-1, (O) LAG-3 and (P) TIM-3. Green circles: functional response, orange circles: dysfunctional response. Bar represents the median.

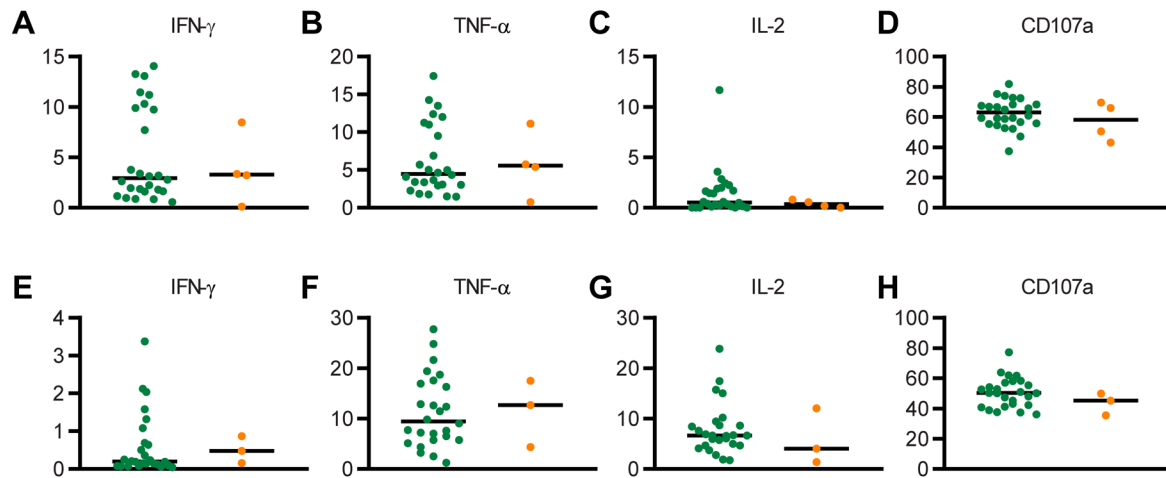

**Fig. S3: Functional analysis of EGFRt<sup>+</sup> final product cells in dysfunctional and functional groups.** A-D. Dot plots of the percentage of CD8<sup>+</sup>EGFRt<sup>+</sup> FP cells secreting IFN-γ (A), TNF-α (B), IL-2 (C) and CD107a (D) following antigen-specific stimulation. E-H. Dot plots of the percentage of CD4<sup>+</sup>EGFRt<sup>+</sup> FP cells secreting IFN-γ (E), TNF-α (F), IL-2 (G) and CD107a (H) in the functional (green) and dysfunctional (orange) groups. Bar represents the median.

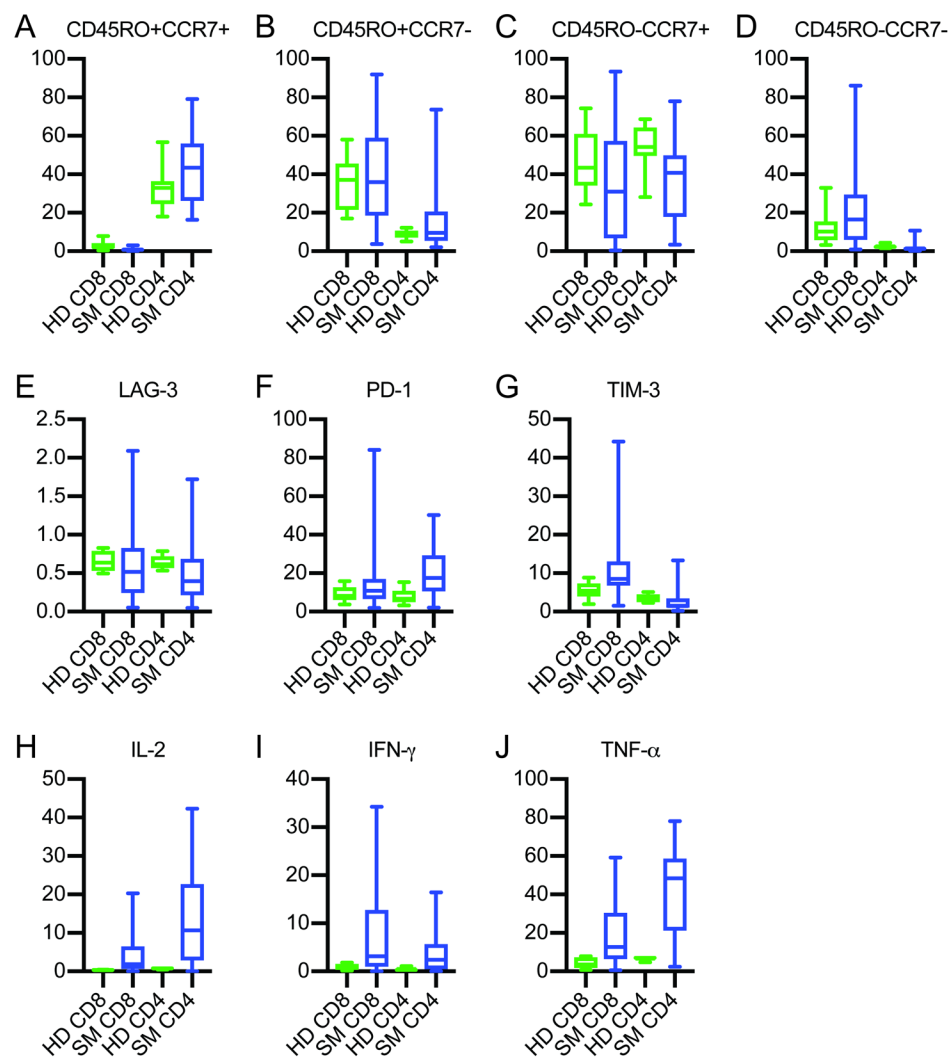

**Fig. S4: Phenotypic analysis of subject T cells.** A-D. Box plots of CD8<sup>+</sup> (left) and CD4<sup>+</sup> (right) cells from healthy donor PBMC (green) and subject starting material (blue) expressing CD45RO<sup>+</sup>CCR7<sup>+</sup> (A), CD45RO<sup>+</sup>CCR7<sup>-</sup> (B), CD45RO<sup>-</sup>CCR7<sup>+</sup> (C), CD45RO<sup>-</sup>CCR7<sup>-</sup> (D). E-G. Box plots of CD8<sup>+</sup> (left) and CD4<sup>+</sup> (right) cells expressing LAG-3 (E), PD-1 (F) and TIM-3 (G) from healthy donor PBMC (green) and subject starting material (blue). H-J. Box plots of CD8<sup>+</sup> (left) and CD4<sup>+</sup> (right) cells secreting IL-2 (H), IFN-γ (I) and TNF-α (J) in response to CD3/CD28 stimulation from healthy donor PBMC (green) and subject starting material (blue). Bar represents the median, box represents the 25% and 75% quartiles, and error bars represent the range.

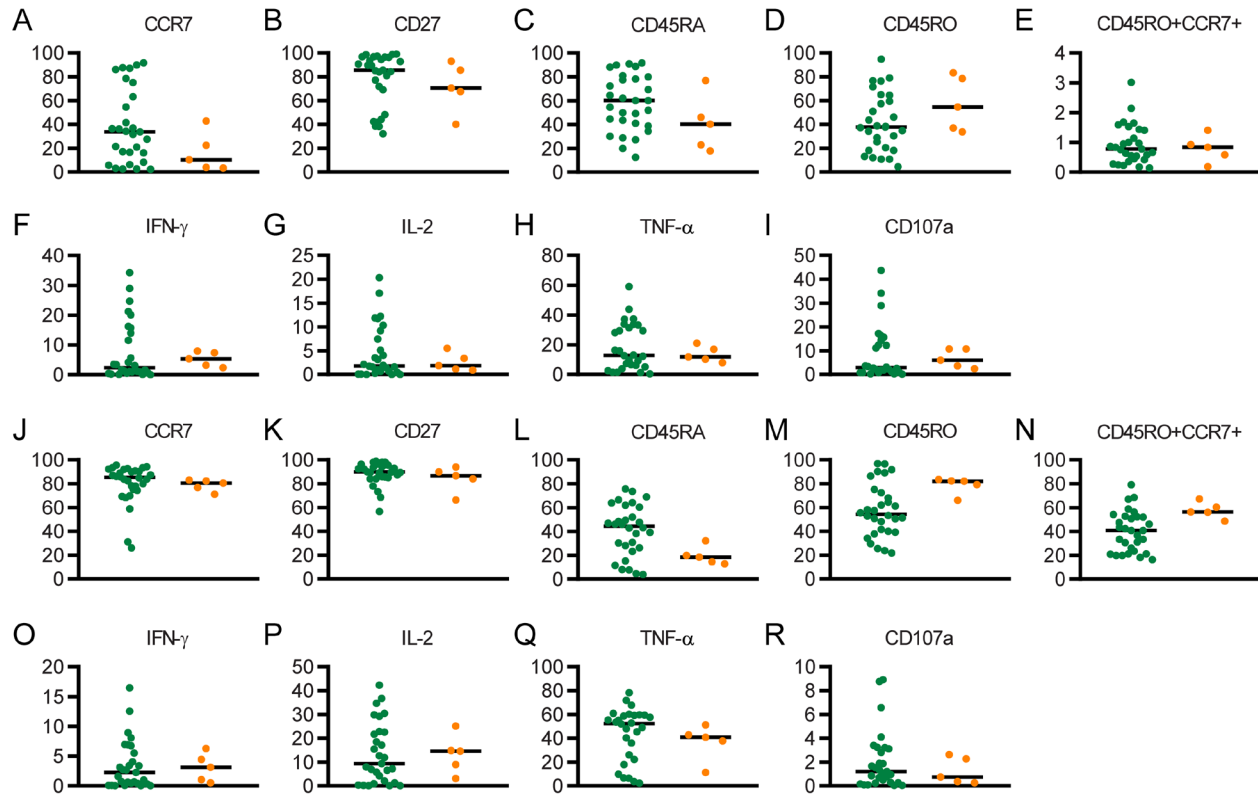

**Fig. S5: Phenotypic and functional analysis of starting material cells in dysfunctional and functional groups.** A-E. Dot plots of CD8<sup>+</sup> starting material cells expressing CCR7 (A), CD27 (B), CD45RA (C), CD45RO (D) and CD45RO<sup>+</sup>CCR7<sup>+</sup> (E). F-I Dot plots of CD8<sup>+</sup> starting material cells secreting IFN- $\gamma$  (F), IL-2 (G), TNF- $\alpha$  (H) and CD107a (I) in response to CD3/CD28 stimulation. J-N. Dot plots of CD4<sup>+</sup> starting material cells expressing CCR7 (J), CD27 (K), CD45RA (L), CD45RO (M) and CD45RO<sup>+</sup>CCR7<sup>+</sup> (N). F-I Dot plots of CD4<sup>+</sup> starting material cells secreting IFN- $\gamma$  (N), IL-2 (O), TNF- $\alpha$  (P) and CD107a (Q) in response to CD3/CD28 stimulation. Green circles: functional response, orange circles: dysfunctional response. Bar represents the median.

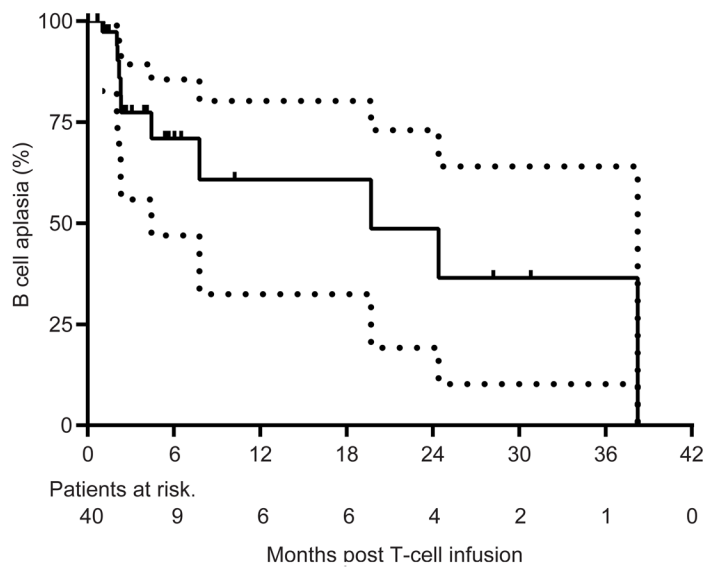

**Fig. S6: B cell aplasia duration.** Kaplan-Meier of B cell aplasia (BCA) of all subjects that achieve BCA (n=40). Median follow-up was 26.2 months. Dotted line represents 95% confidence.

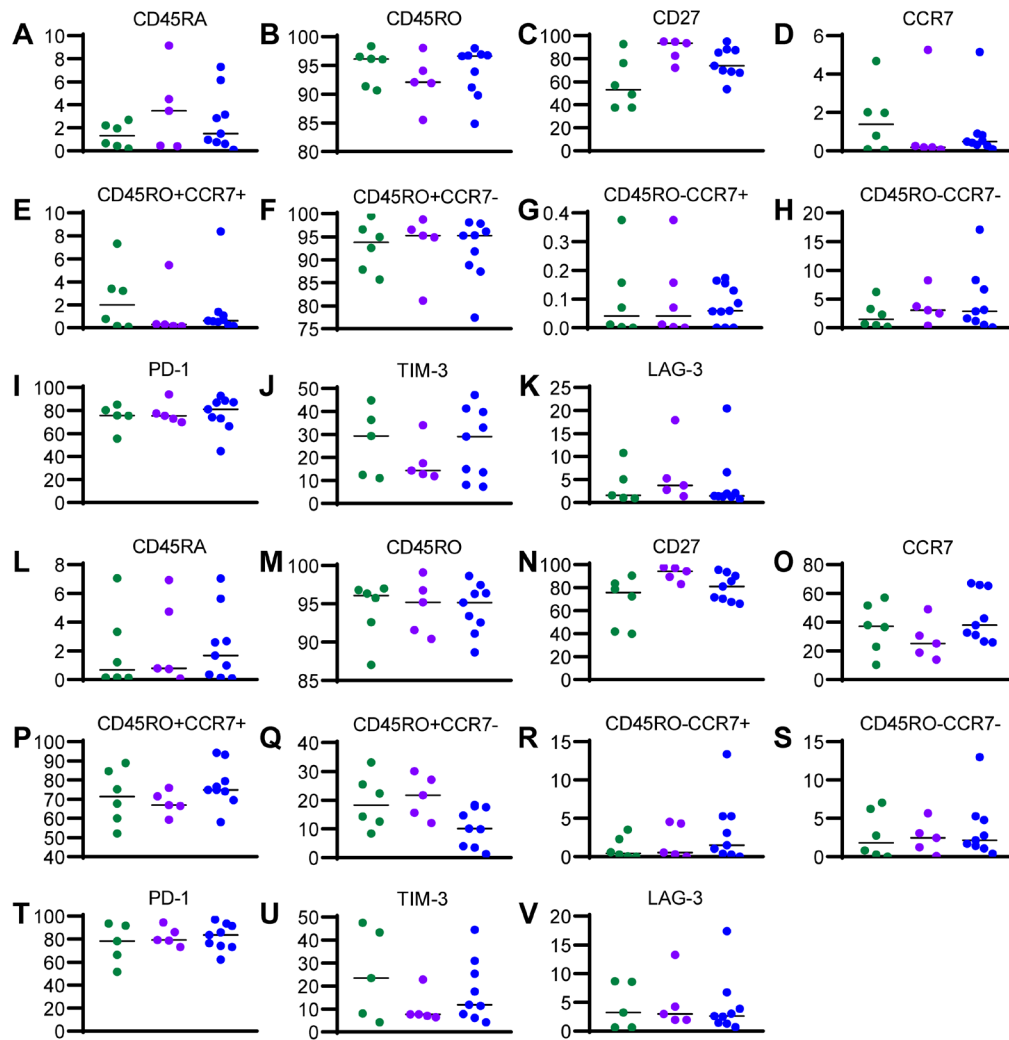

**Fig. S7: Phenotypic analysis of EGFRt<sup>+</sup> cells at peak expansion in shortBCA, mediumBCA and longBCA groups.** A-O. Dot plots of CD8<sup>+</sup>EGFRt<sup>+</sup> cells expressing CD45RA (A), CD45RO (B), CD27 (C), CCR7 (D), CD45RO<sup>+</sup>CCR7<sup>+</sup> (E), CD45RO<sup>+</sup>CCR7<sup>-</sup> (F), CD45RO<sup>-</sup>CCR7<sup>+</sup> (G), CD45RO<sup>-</sup>CCR7<sup>-</sup> (J), PD-1 (I), TIM-3 (J) and LAG-3 (K). L-V. Dot plots of CD4<sup>+</sup>EGFRt<sup>+</sup> cells expressing CD45RA (L), CD45RO (M), CD27 (N), CCR7 (O), CD45RO<sup>+</sup>CCR7<sup>+</sup> (P), CD45RO<sup>+</sup>CCR7<sup>-</sup> (Q), CD45RO<sup>-</sup>CCR7<sup>+</sup> (R), CD45RO<sup>-</sup>CCR7<sup>-</sup> (S), PD-1 (T), TIM-3 (U) and LAG-3 (V). Bar represents the median. Green circles: longBCA, purple circles: mediumBCA, blue circles: shortBCA.

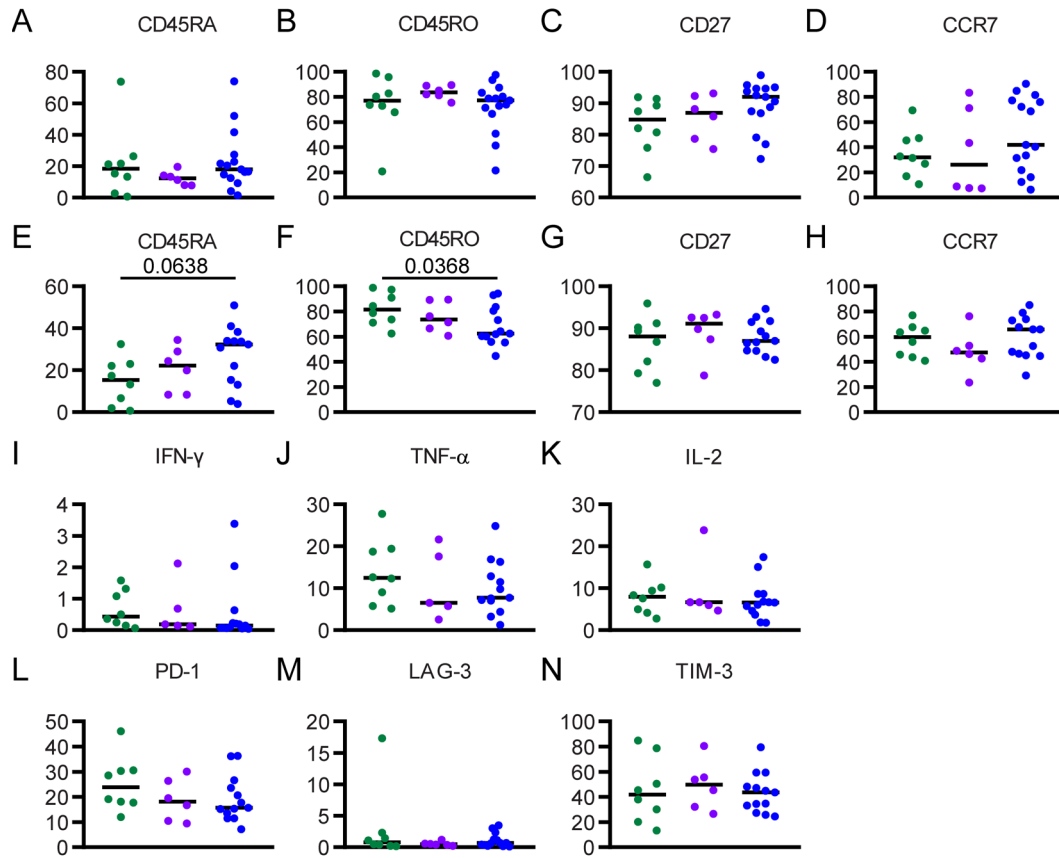

**Fig. S8: Phenotypic and functional analysis of EGFRt<sup>+</sup> final product cells in BCA groups.**

A-D. Percentage of CD8<sup>+</sup>EGFRt<sup>+</sup> FP cells expressing CD45RA (A), CD45RO (B), CD27 (C) and CCR7 (D). E-H. Percentage of CD4<sup>+</sup>EGFRt<sup>+</sup> FP cells expressing CD45RA (E), CD45RO (F), CD27 (G) and CCR7 (H). I-J. Percentage of CD4<sup>+</sup>EGFRt<sup>+</sup> FP cells secreting IFN- $\gamma$  (I), IL-2 (J), TNF- $\alpha$  (K) in response to antigen-specific stimulation. L-N. Percentage of CD4<sup>+</sup>EGFRt<sup>+</sup> FP cells expressing PD-1 (L), LAG-3 (N) and TIM-3 (O). Bars represent the median, p values calculated using a Mann-Whitney test. Green circles: longBCA, purple circles: mediumBCA, blue circles: shortBCA. Bar represents the median.
